# Supplementary material for: A uniformly anchored zirconocene complex on magnetic reduced graphene oxide (rGO@Fe3O4/ZrCp2Clx(x= 0, 1, 2)) as a novel and reusable nanocatalyst for synthesis ofN-arylacetamides and reductive-acetylation of nitroarenes
Source: Royal Society of Chemistry journal article supplement (doi:10.1039/d2ra02293a), 2022-01-01

**Uniformly Anchored Zirconocene Complex on Magnetic Reduced Graphene Oxide,  
(rGO@Fe<sub>3</sub>O<sub>4</sub>/ZrCp<sub>2</sub>Cl<sub>x</sub> (x = 0, 1, 2)) as a Novel and Reusable Nanocatalyst for Synthesis of *N*-  
Arylacetamides and Reductive-Acetylation of Nitroarenes**

Massood Bayzidi<sup>a</sup> and Behzad Zeynizadeh<sup>\*b</sup>

Department of Chemistry, Urmia University, Urmia 5756151818, Iran

<sup>a</sup>Email: m.bayzidi@urmia.ac.ir; massoodbayzidi@gmail.com

<sup>b</sup>Email: b.zeynizadeh@urmia.ac.ir; bzeynizadeh@gmail.com

Table of contents (**Figure S1**)

|                                                                                                         |      |
|---------------------------------------------------------------------------------------------------------|------|
| SEM of rGO                                                                                              | S2-3 |
| SEM of rGO@Fe <sub>3</sub> O <sub>4</sub>                                                               | S4   |
| SEM of rGO@Fe <sub>3</sub> O <sub>4</sub> /ZrCp <sub>2</sub> Cl <sub>x</sub> (x = 0, 1, 2)              | S5   |
| SEM of the recycled rGO@Fe <sub>3</sub> O <sub>4</sub> /ZrCp <sub>2</sub> Cl <sub>x</sub> (x = 0, 1, 2) | S6   |
| EDX analysis of rGO@Fe <sub>3</sub> O <sub>4</sub> /ZrCp <sub>2</sub> Cl <sub>x</sub> (x = 0, 1, 2)     | S7   |
| <sup>1</sup> H and <sup>13</sup> C NMR (Table 2, Entry 9)                                               | S8   |
| <sup>1</sup> H and <sup>13</sup> C NMR (Table 2, Entry 12)                                              | S9   |
| <sup>1</sup> H and <sup>13</sup> C NMR (Table 3, Entry 2)                                               | S10  |
| <sup>1</sup> H and <sup>13</sup> C NMR (Table 3, Entry 3)                                               | S11  |
| <sup>1</sup> H and <sup>13</sup> C NMR (Table 3, Entry 9)                                               | S12  |
| <sup>1</sup> H and <sup>13</sup> C NMR (Table 3, Entry 12)                                              | S13  |
| <sup>1</sup> H and <sup>13</sup> C NMR (Table 4, Entry 2)                                               | S14  |
| <sup>1</sup> H and <sup>13</sup> C NMR (Table 4, Entry 7)                                               | S15  |
| <sup>1</sup> H and <sup>13</sup> C NMR (Table 4, Entry 10)                                              | S16  |

**Figure S2.** SEM image of rGO

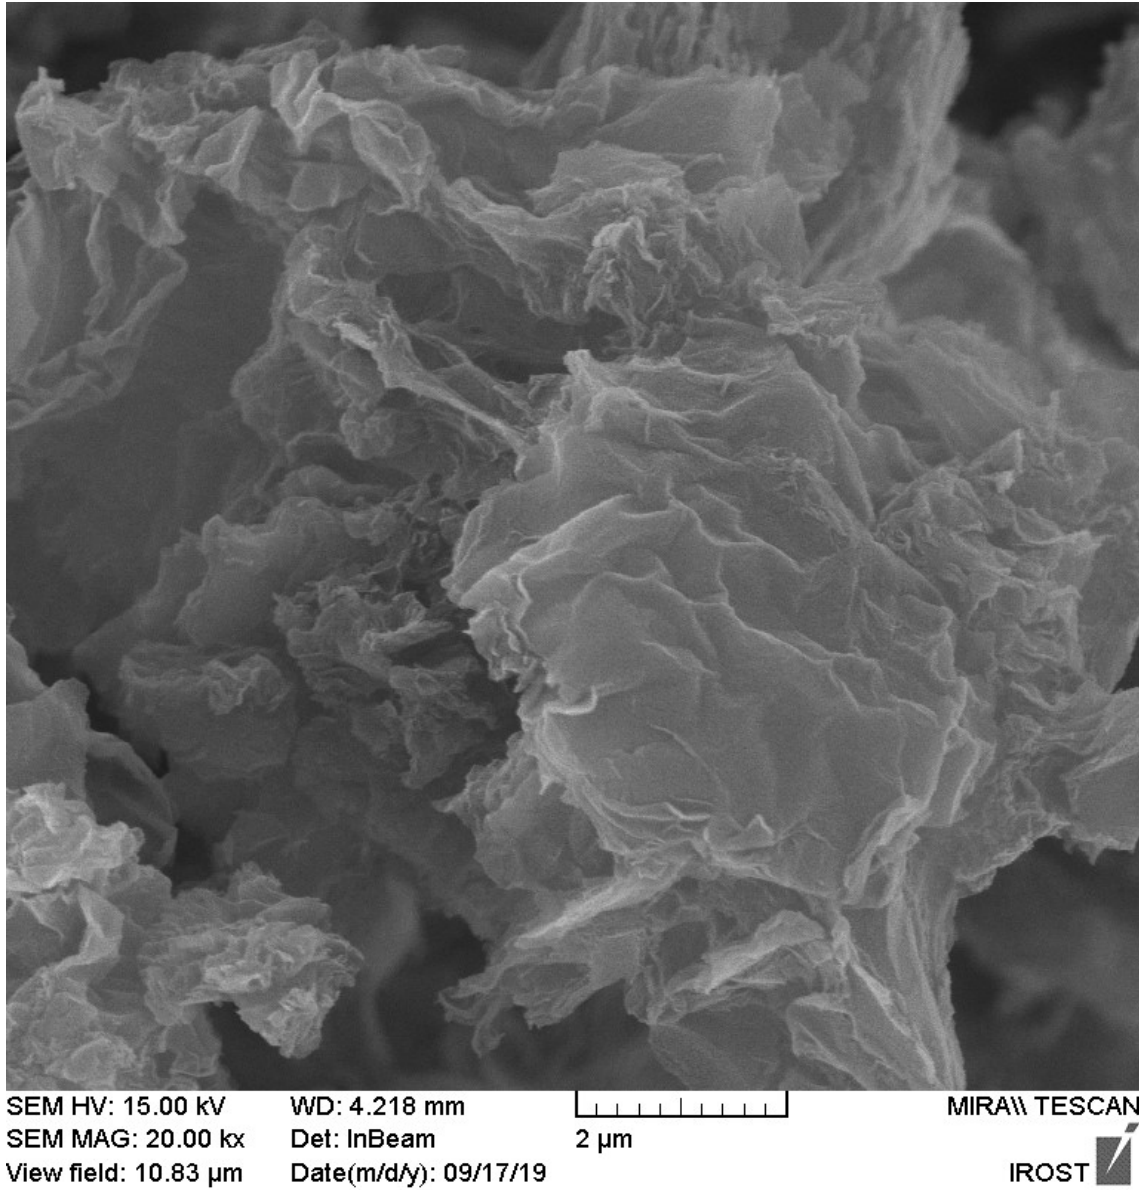

**Figure S3.** SEM image of rGO

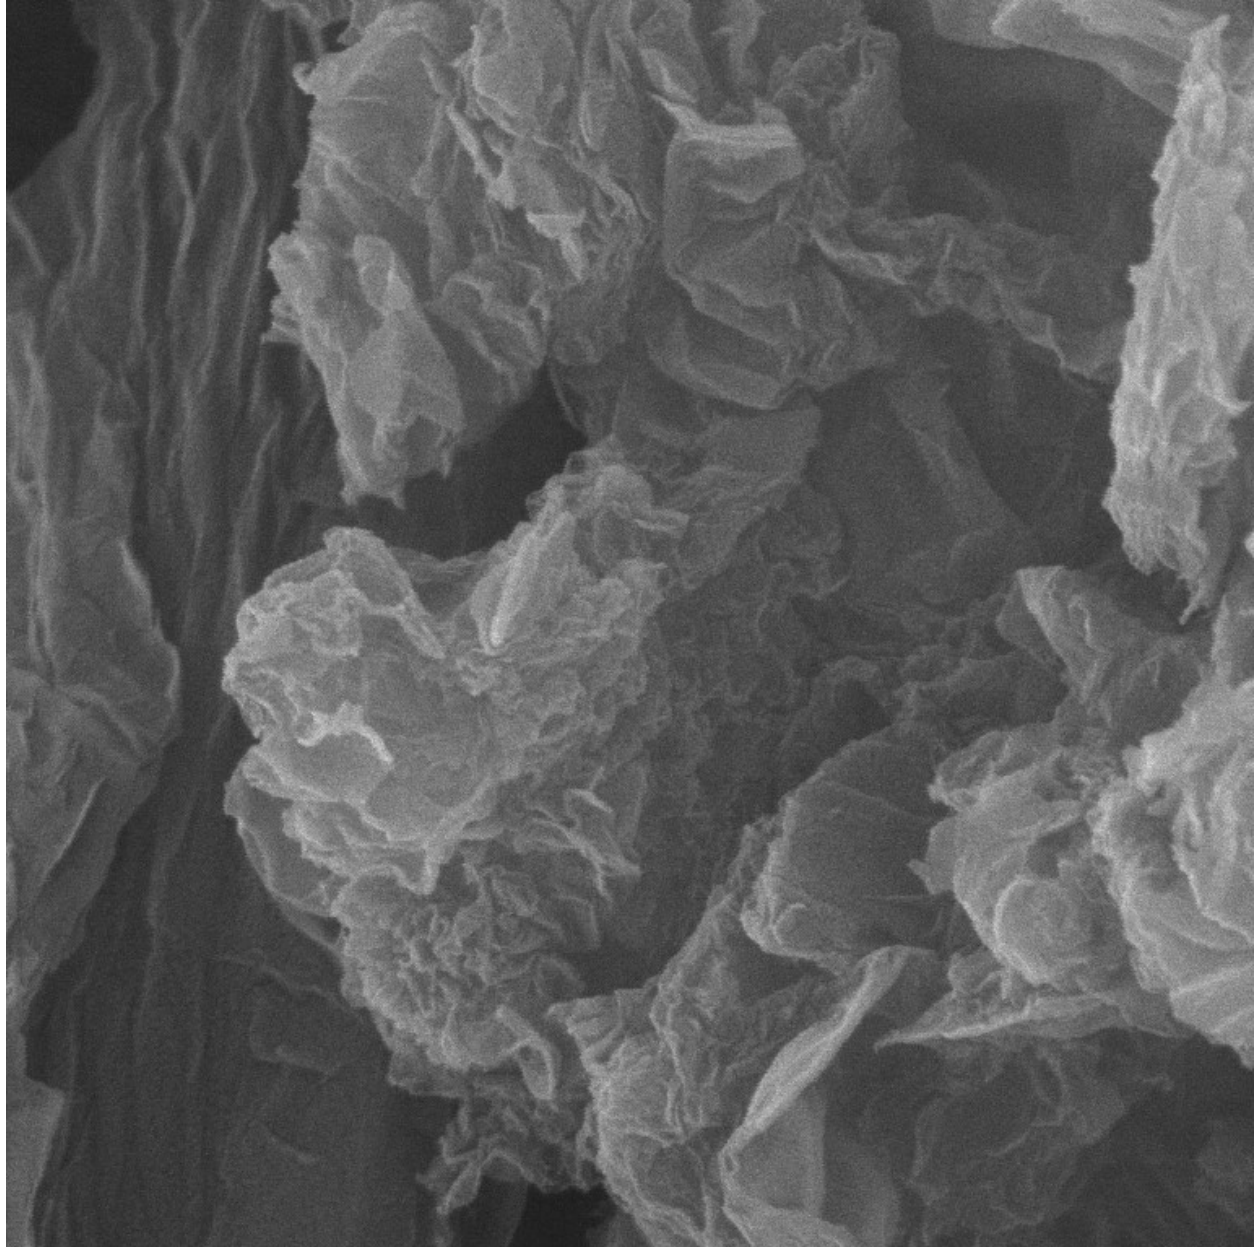

SEM HV: 15.00 kV  
SEM MAG: 35.00 kx  
View field: 6.191  $\mu\text{m}$

WD: 4.220 mm  
Det: InBeam  
Date(m/d/y): 09/17/19

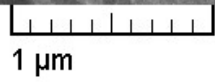

MIRA\\ TESCAN

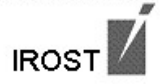

**Figure S4.** SEM image of rGO@Fe<sub>3</sub>O<sub>4</sub>

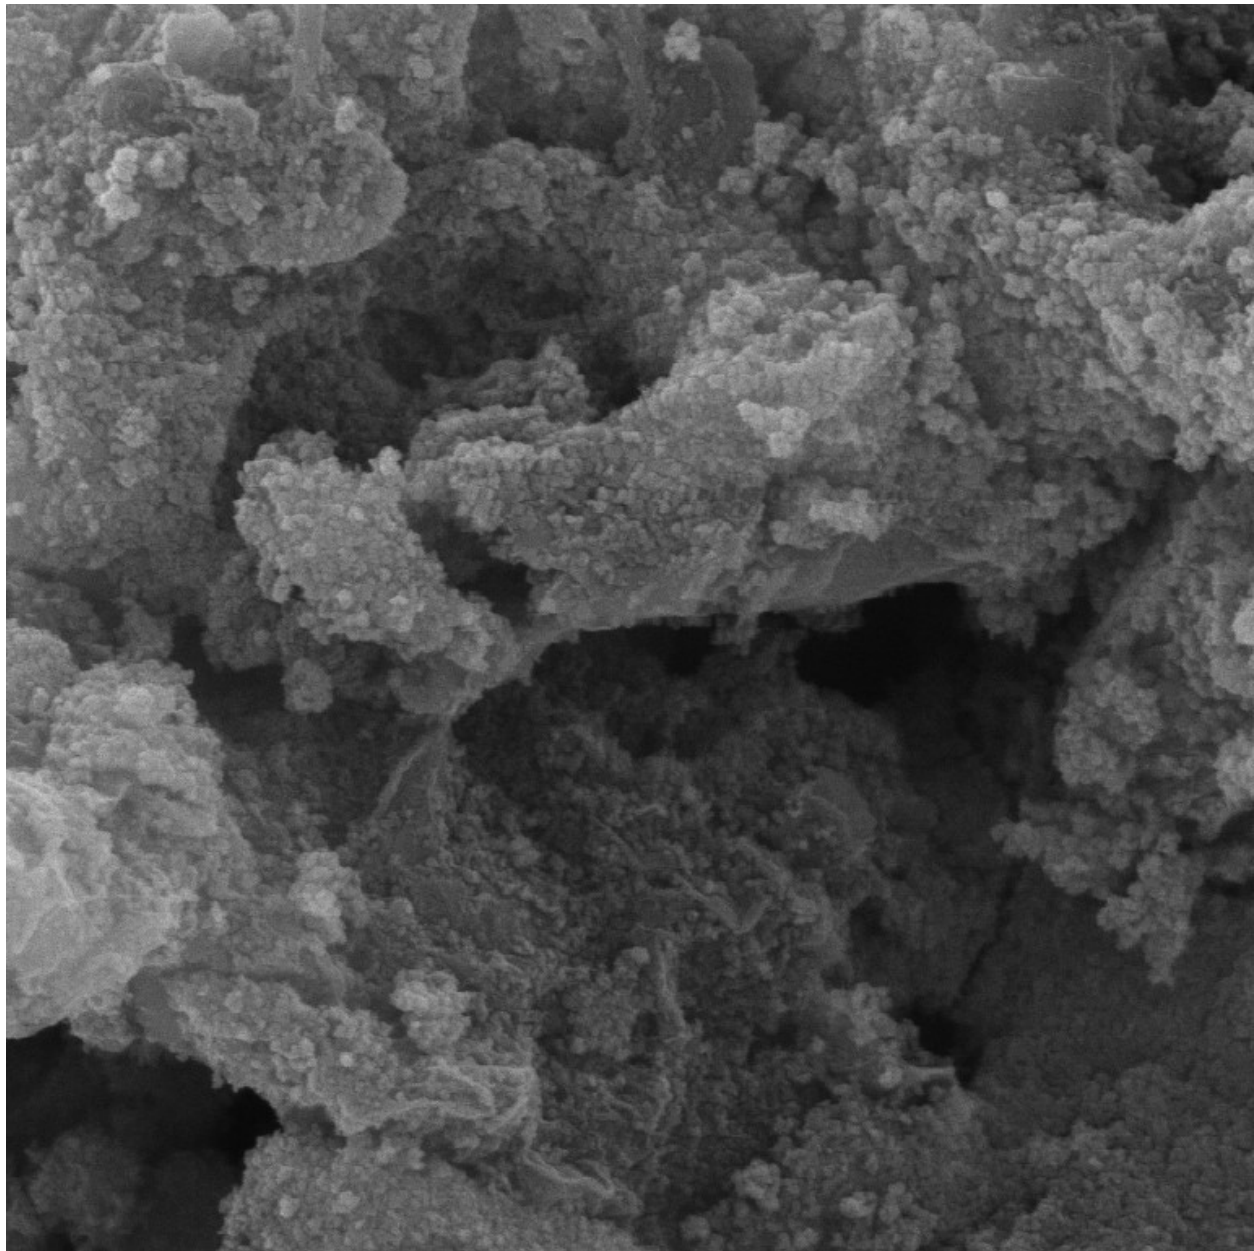

SEM HV: 15.00 kV  
SEM MAG: 35.00 kx  
View field: 6.191  $\mu$ m

WD: 3.839 mm  
Det: InBeam  
Date(m/d/y): 09/17/19

1  $\mu$ m

MIRA\\ TESCAN

IROST 

**Figure S5.** SEM image of  $\text{rGO}@Fe_3O_4/\text{ZrCp}_2\text{Cl}_x$  ( $x=0, 1, 2$ )

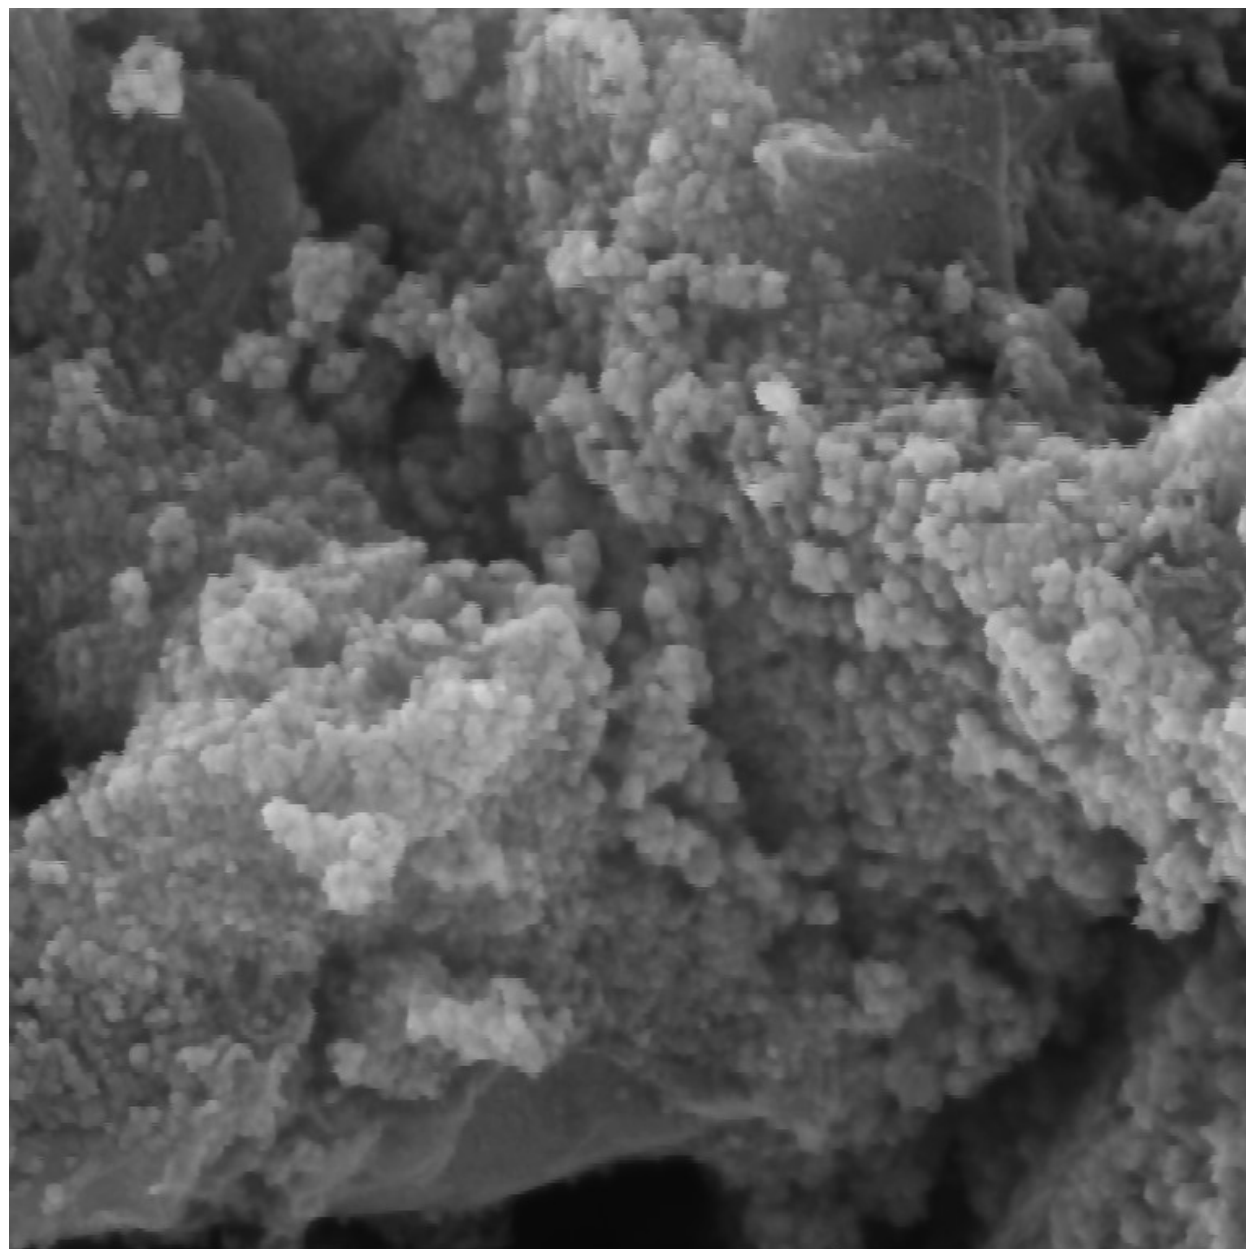

SEM HV: 15.00 kV  
SEM MAG: 70.00 kx  
View field: 3.096  $\mu\text{m}$

WD: 3.839 mm  
Det: InBeam  
Date(m/d/y): 09/17/19

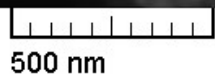

MIRAX TESCANA

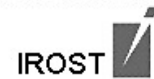

**Figure S6.** SEM image of the recycled  $\text{rGO@Fe}_3\text{O}_4/\text{ZrCp}_2\text{Cl}_x$  ( $x=0, 1, 2$ )

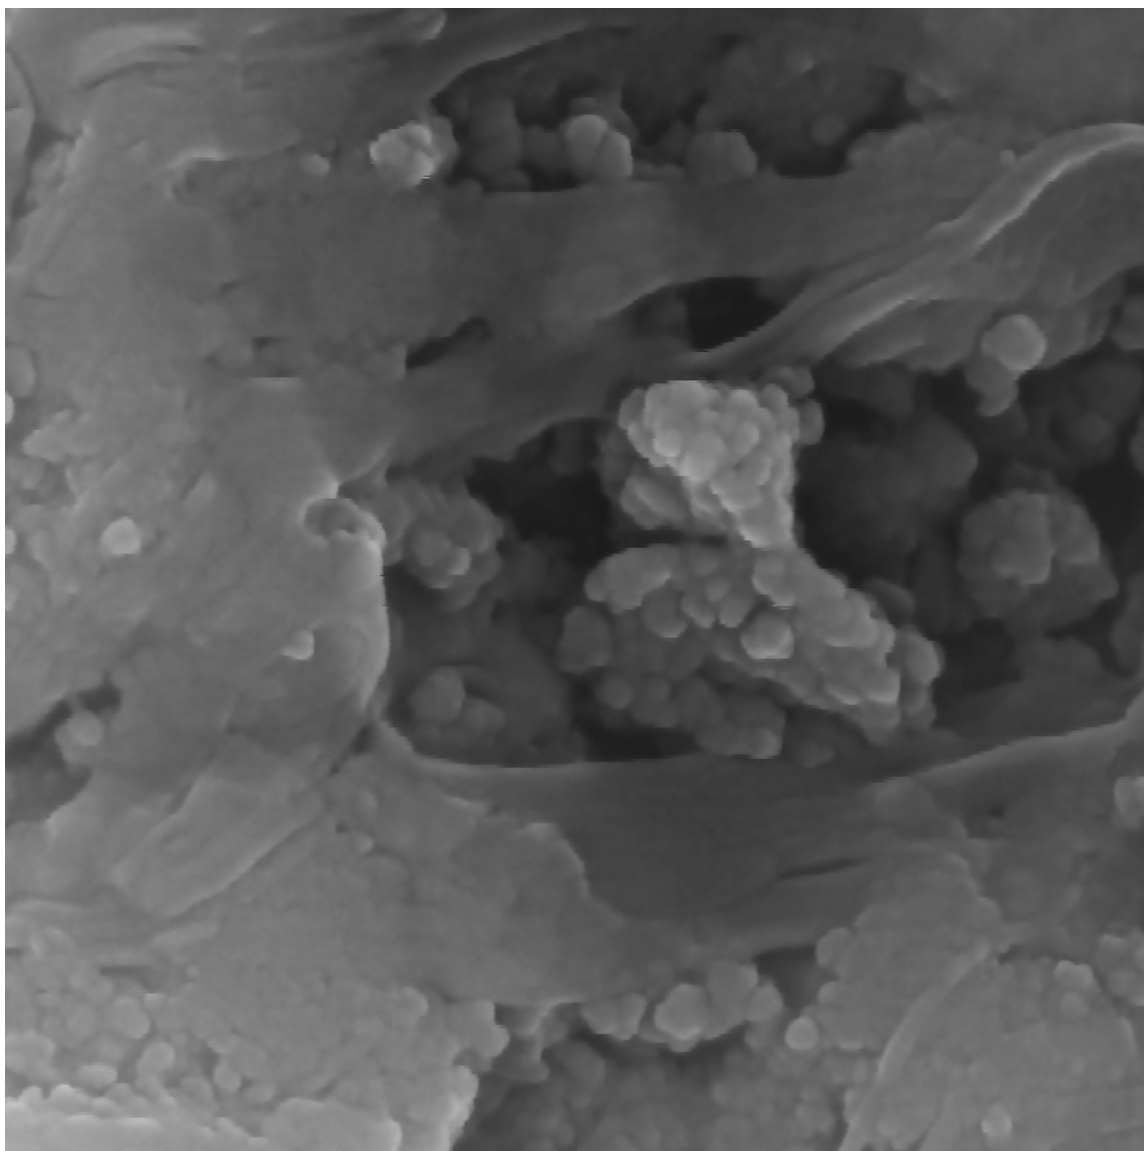

SEM HV: 15.00 kV  
SEM MAG: 70.00 kx  
View field: 3.096  $\mu\text{m}$

WD: 4.014 mm  
Det: InBeam  
Date(m/d/y): 09/17/19

500 nm

MIRAM TESCAN

IROST 

**Figure S7.** EDX analysis of rGO@Fe<sub>3</sub>O<sub>4</sub>/ZrCp<sub>2</sub>Cl<sub>x</sub> (x= 0, 1, 2)

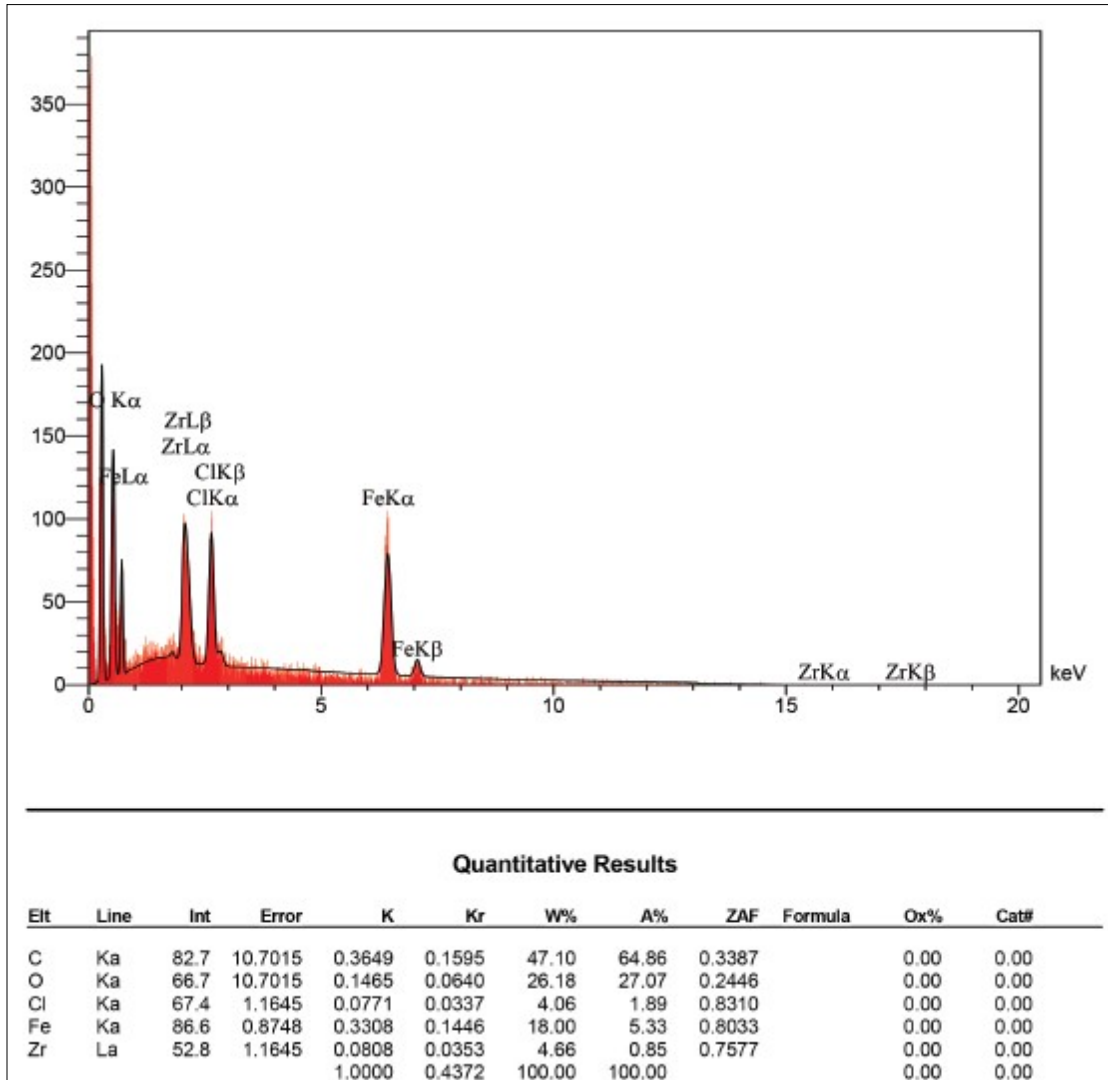

Figure S8. 1-(3-aminophenyl)ethanol (Table 2, Entry 9)

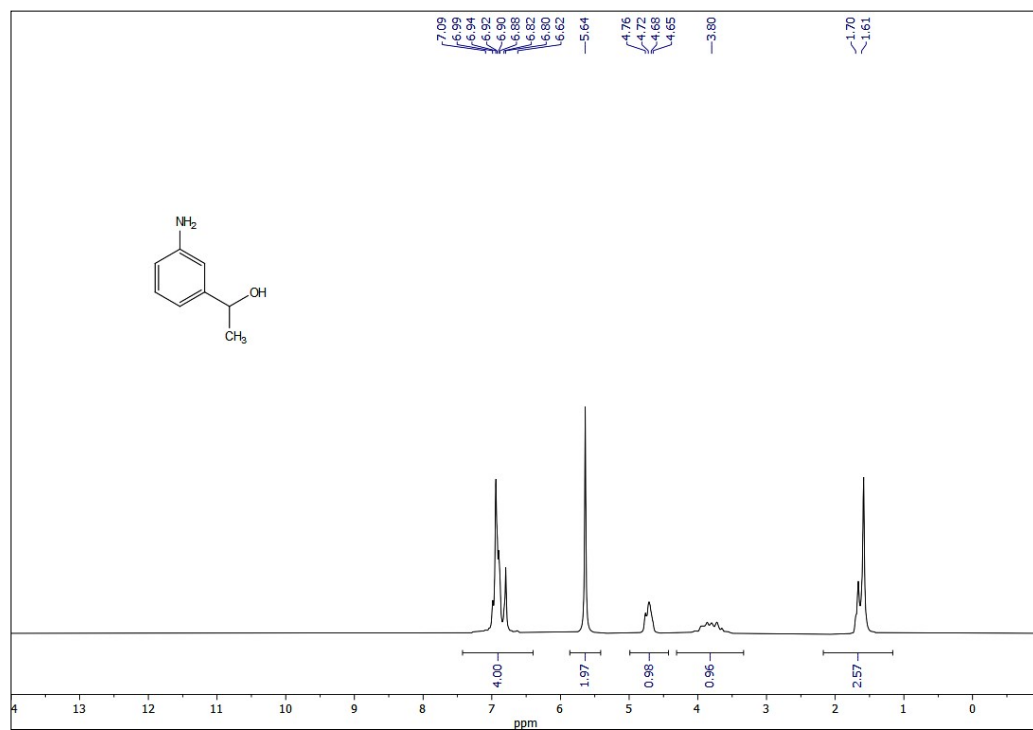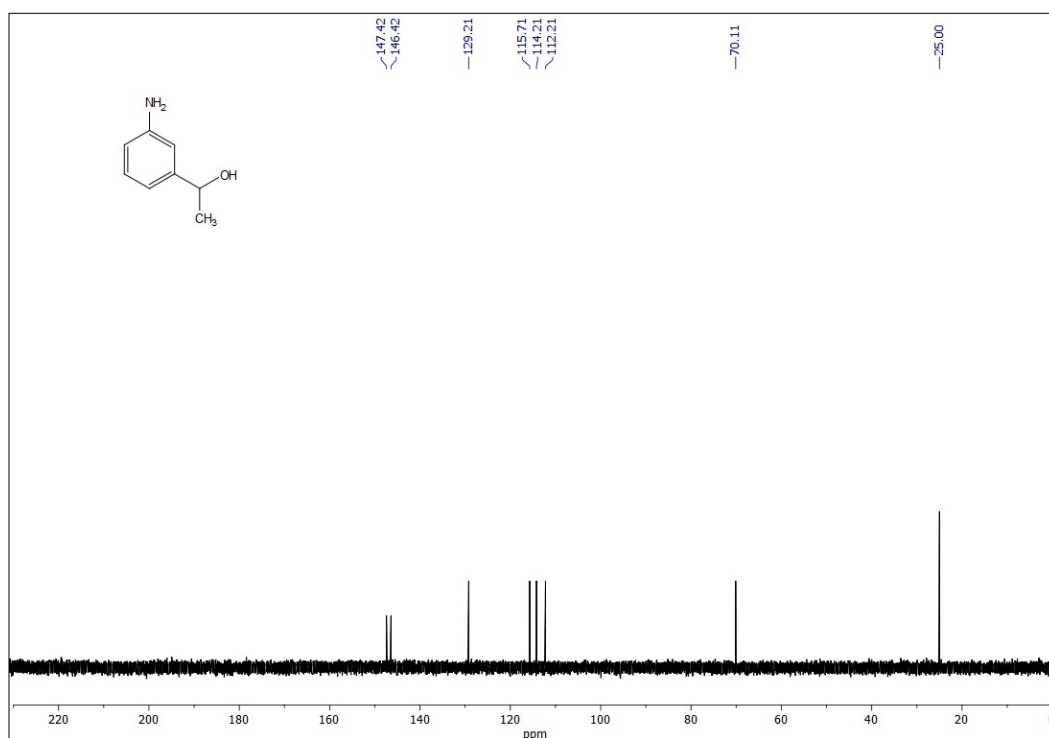



Figure S9. 1,3,5-triaminobenzene (Table 2, Entry 12)

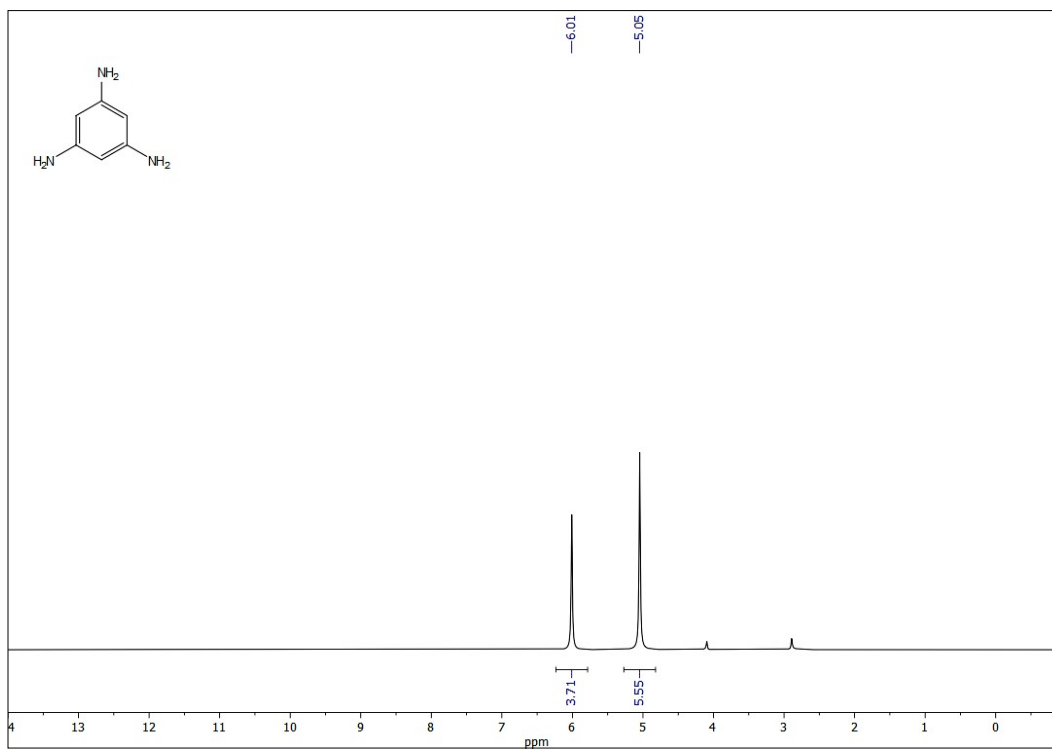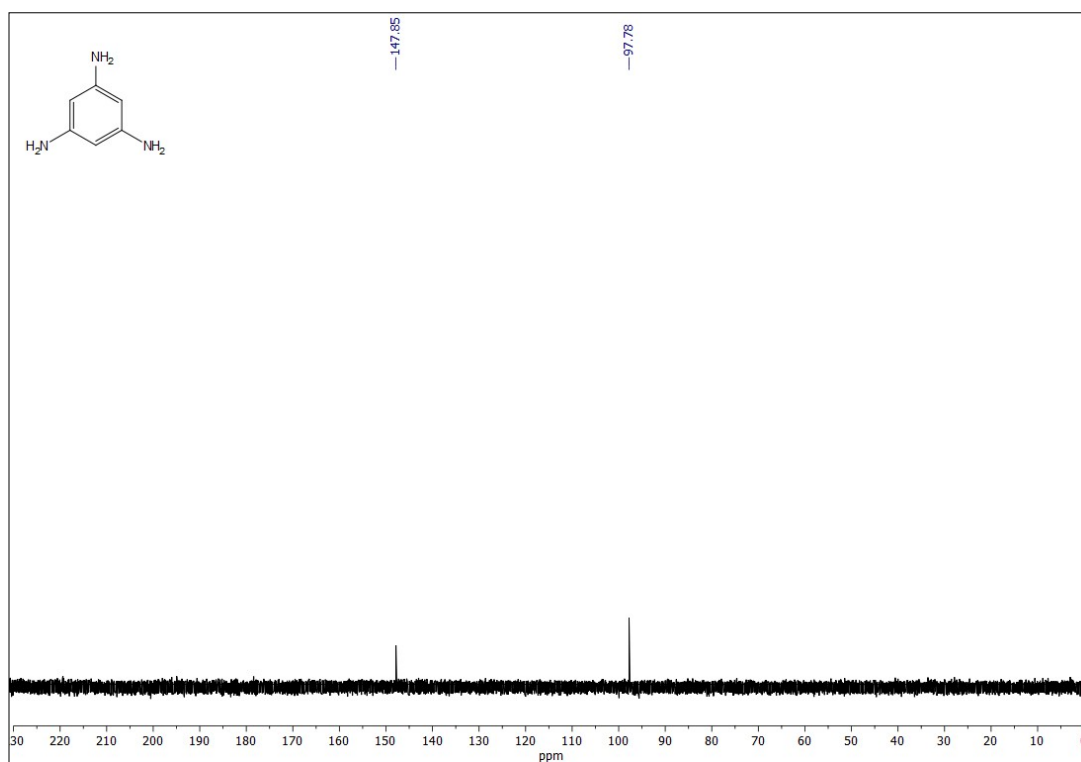

Figure S10. 4-Amino phenol (Table 3, Entry 2)

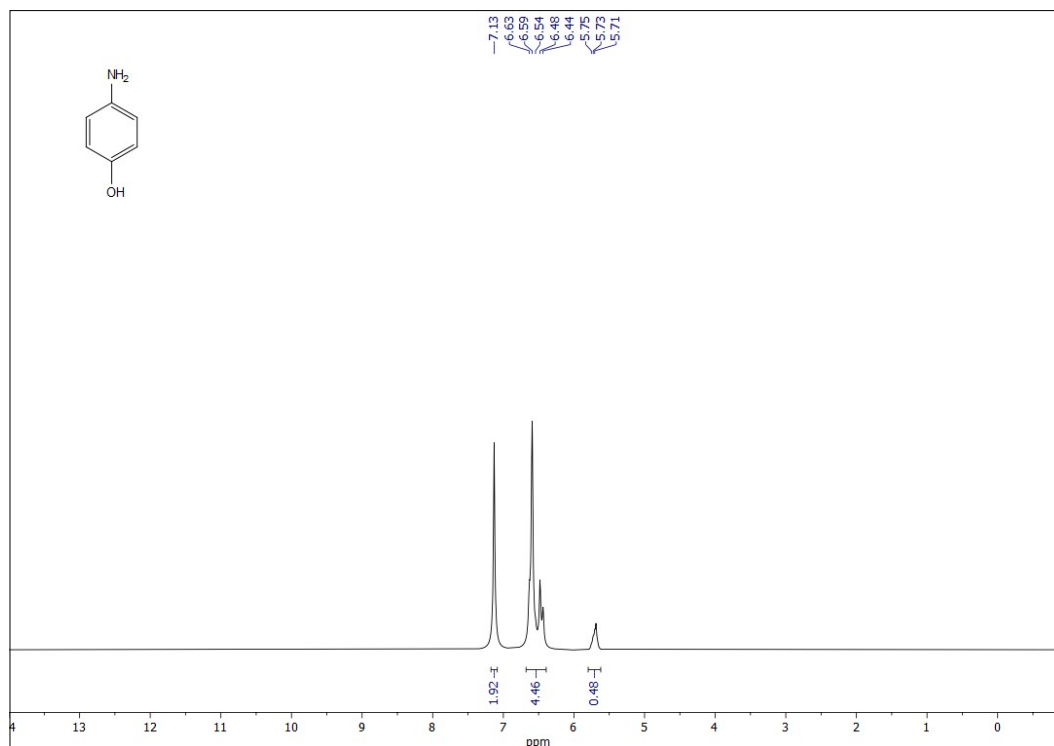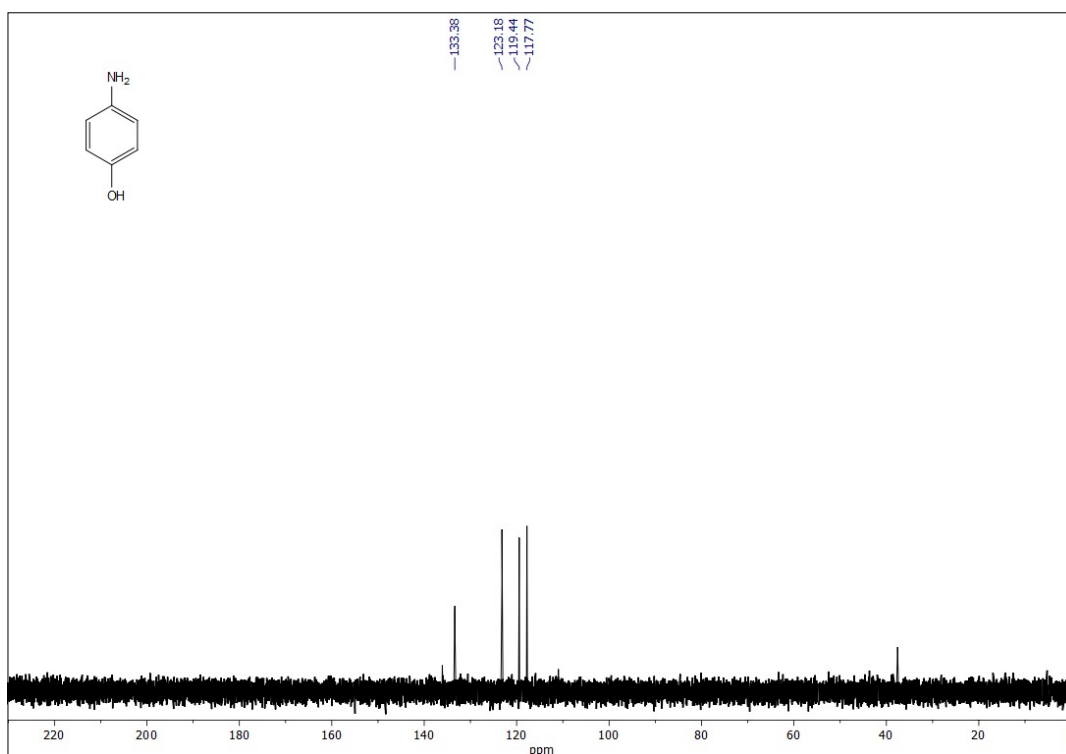

Figure S11. *N,N'*-(1,4-phenylene)diacetamide (Table 3, Entry 3)

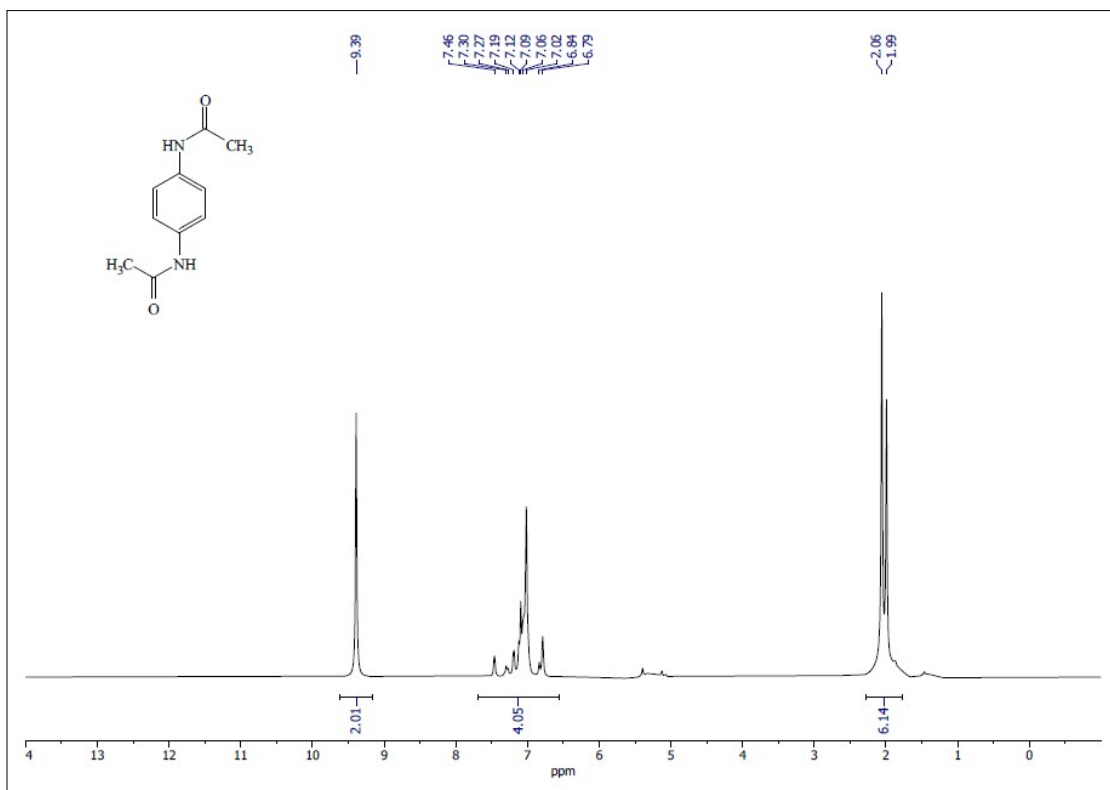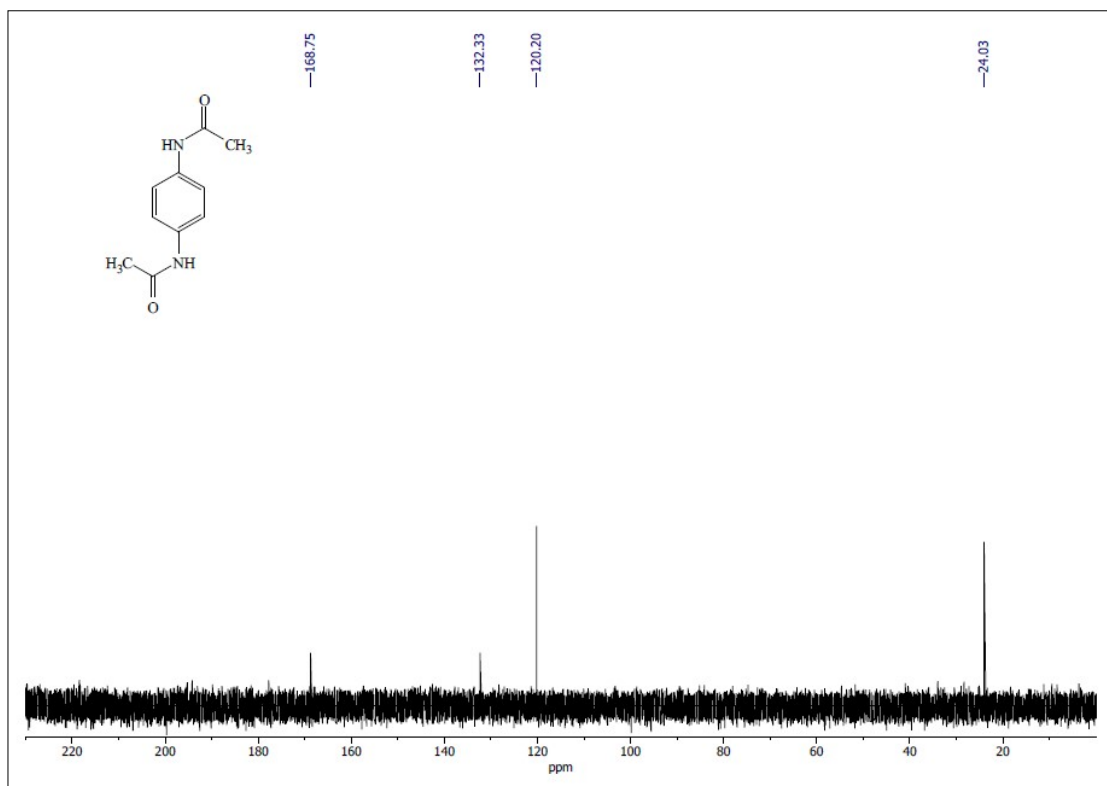

Figure S12. *N*-(3-(1-hydroxyethyl)phenyl)acetamide (Table 3, Entry 9)

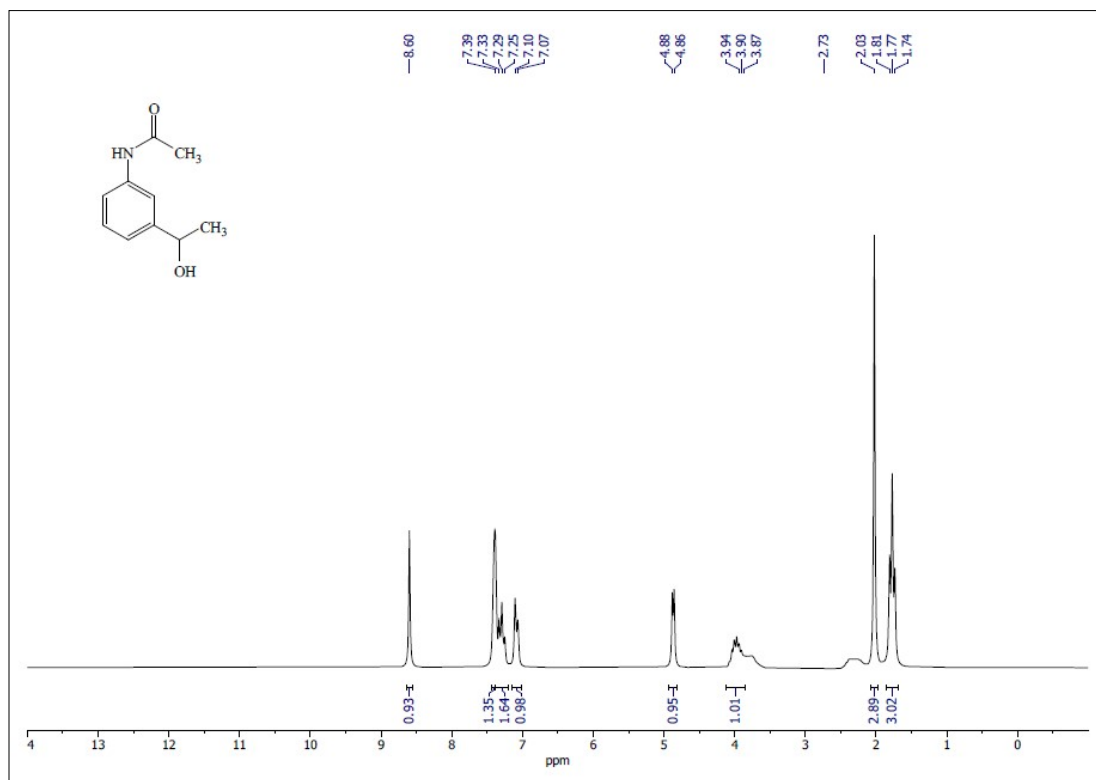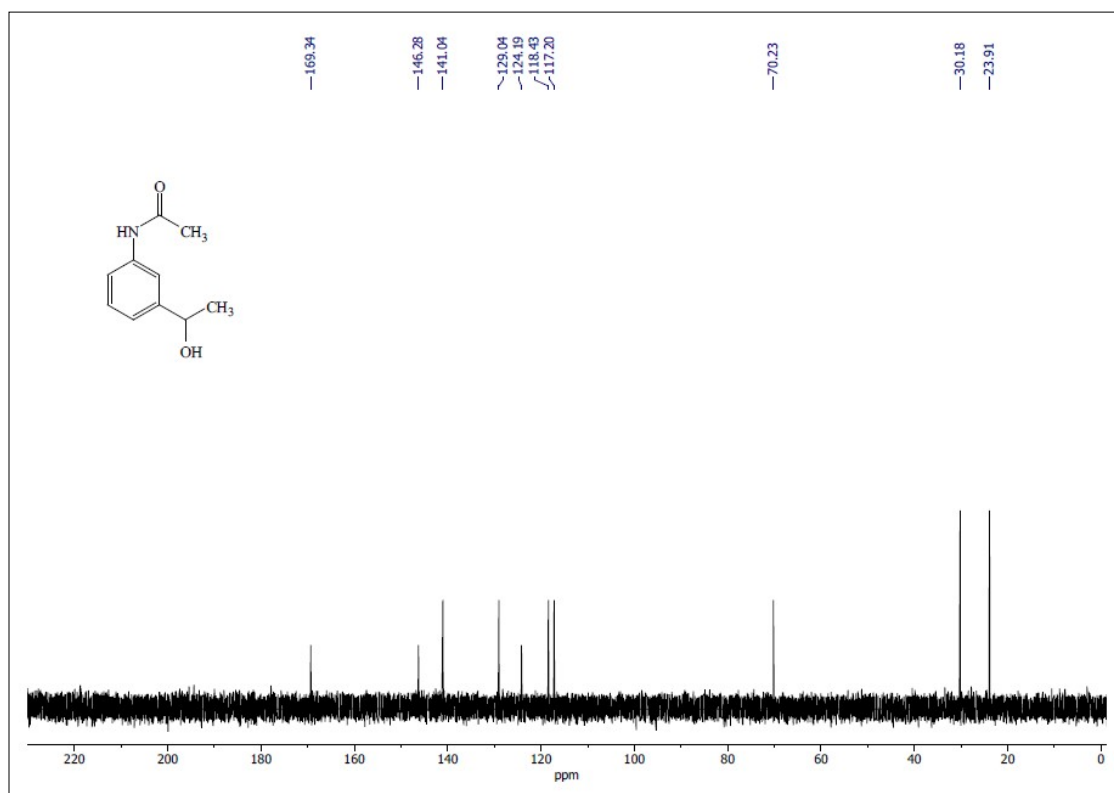

Figure S13. *N,N',N''*-(benzene-1,3,5-triyl)triacetamide (Table 3, Entry 12)

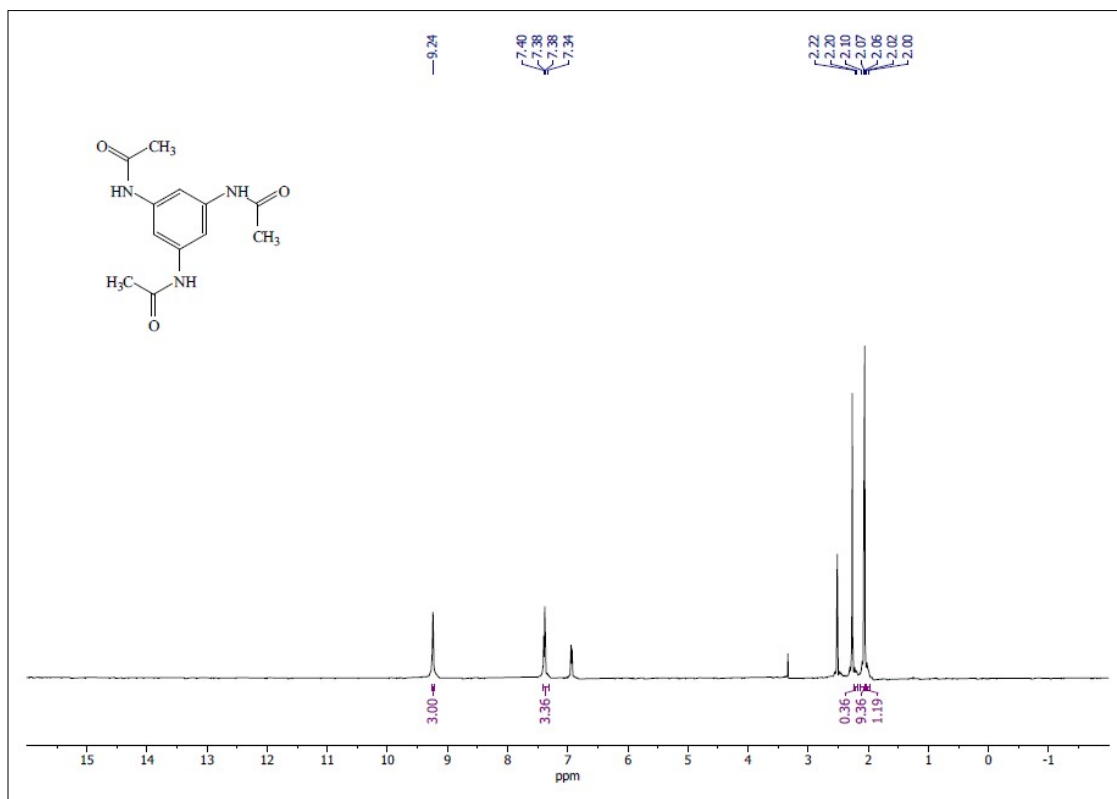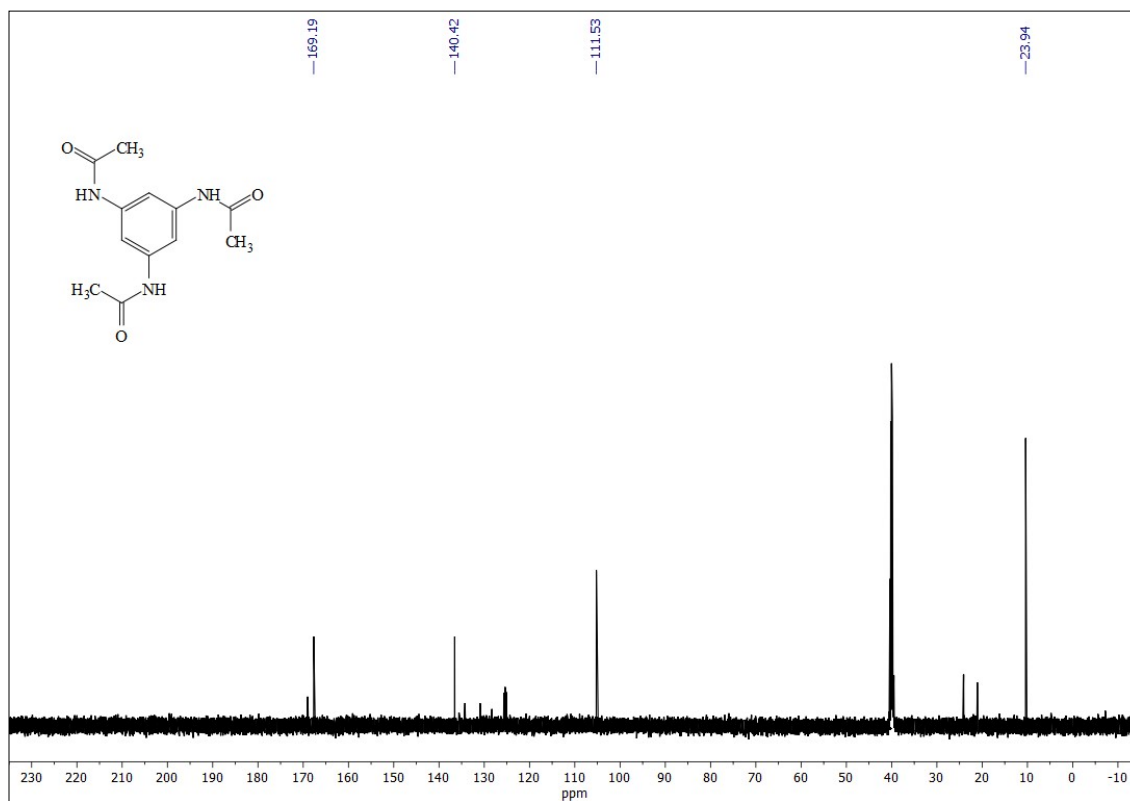

Figure S14. *N*-(4-methoxyphenyl)acetamide (Table 4, Entry 2)

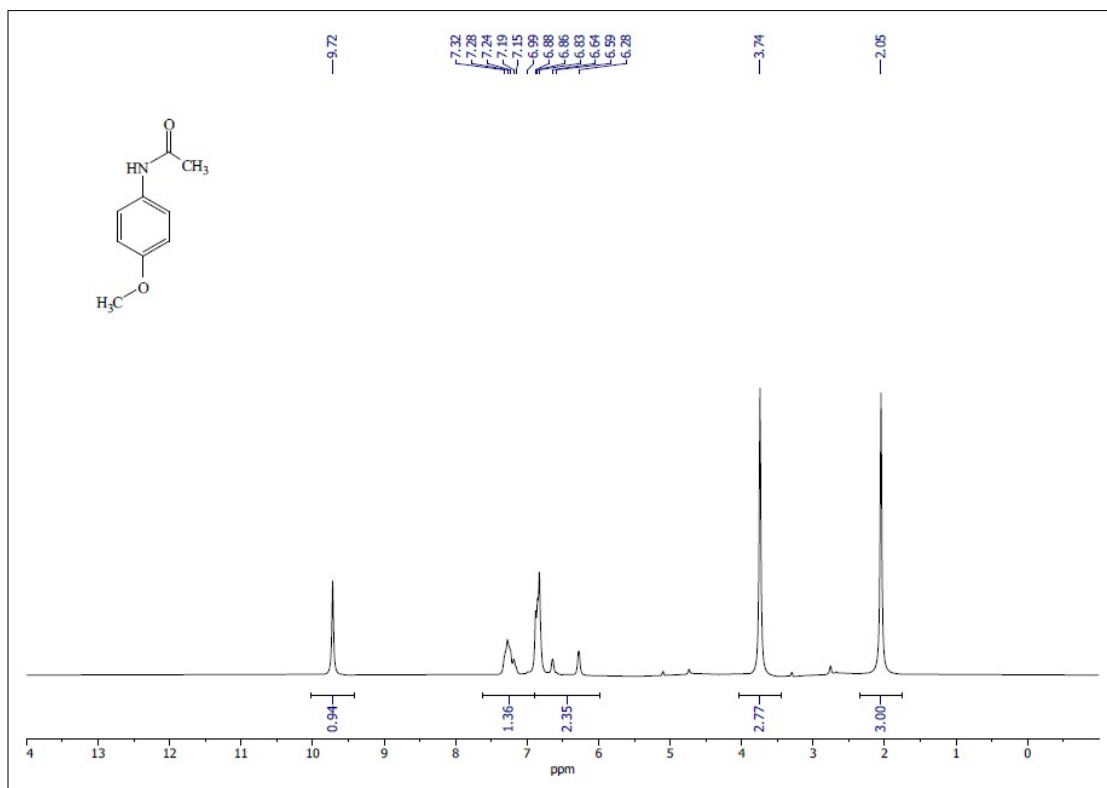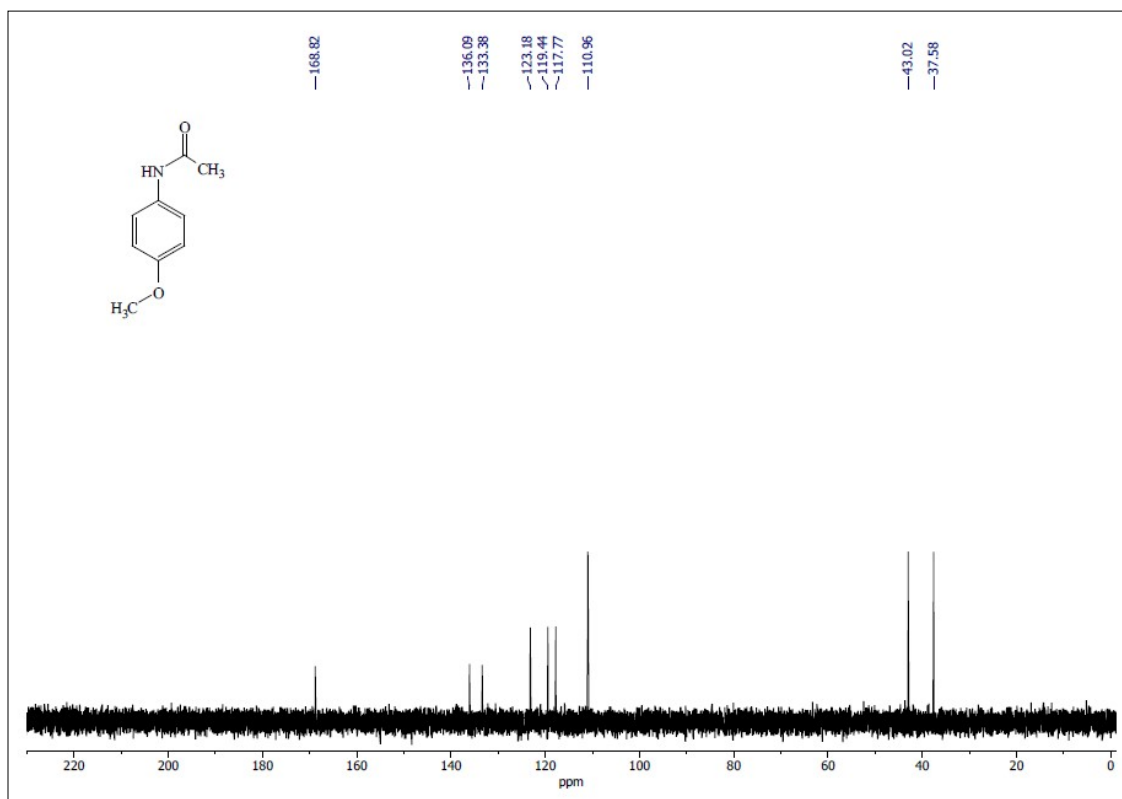

Figure S15. *N,N'*-(4-methyl-1,2-phenylene)diacetamide (Table 4, Entry 7)

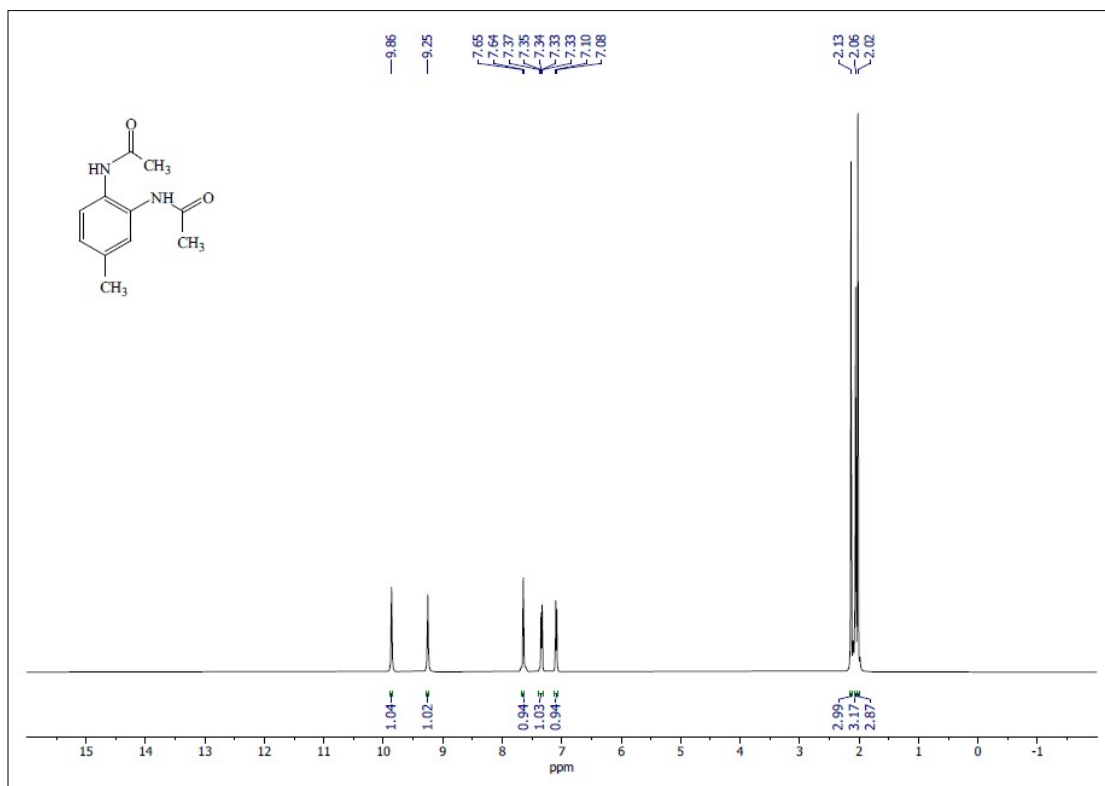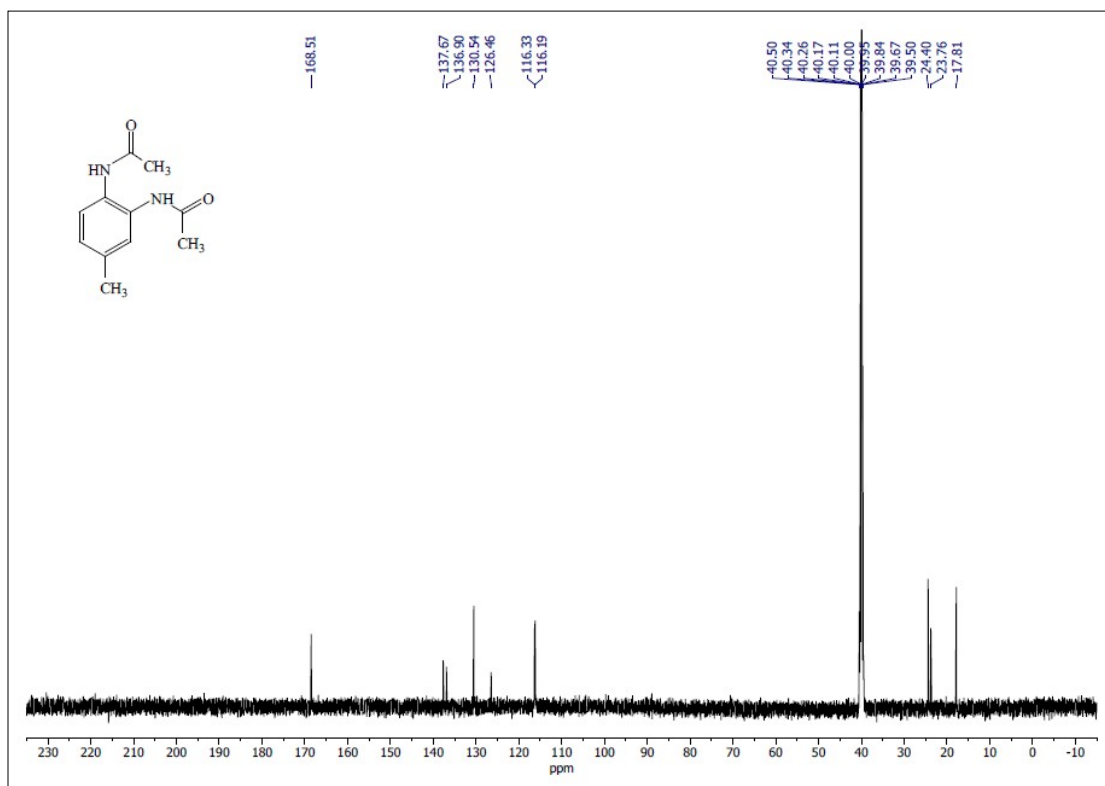

Figure S16. *N*-(3-acetylphenyl)acetamide (Table 4, Entry 10)

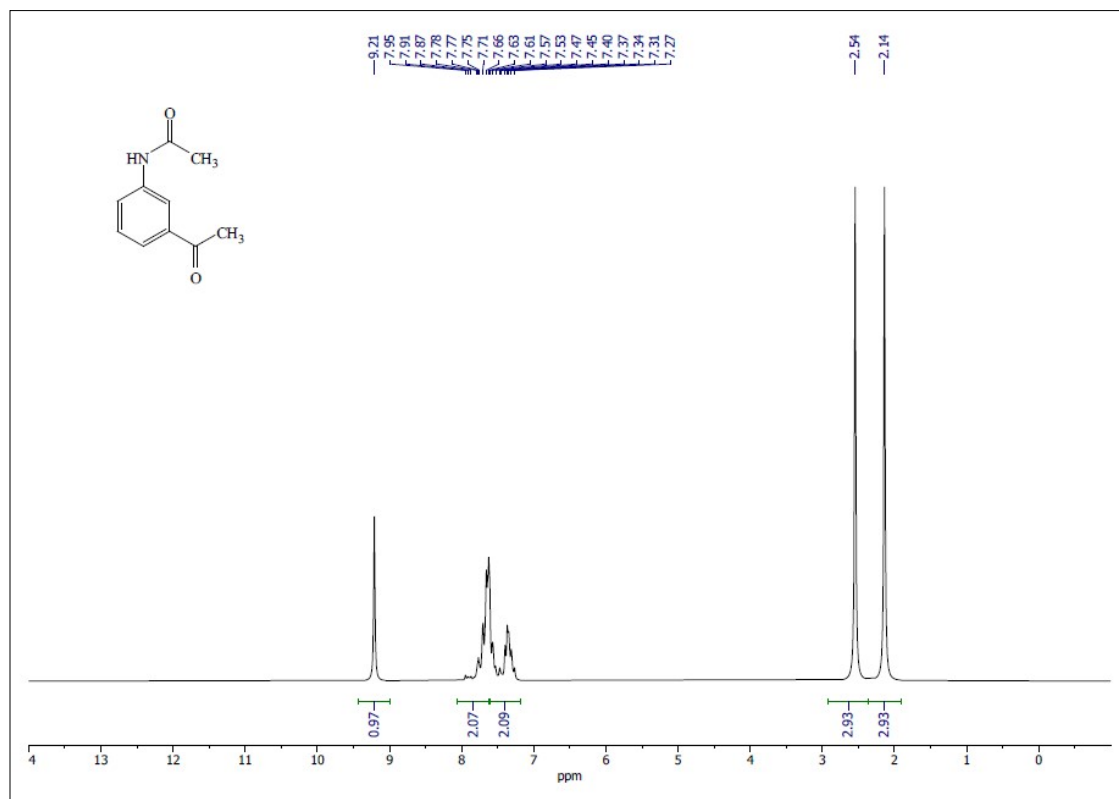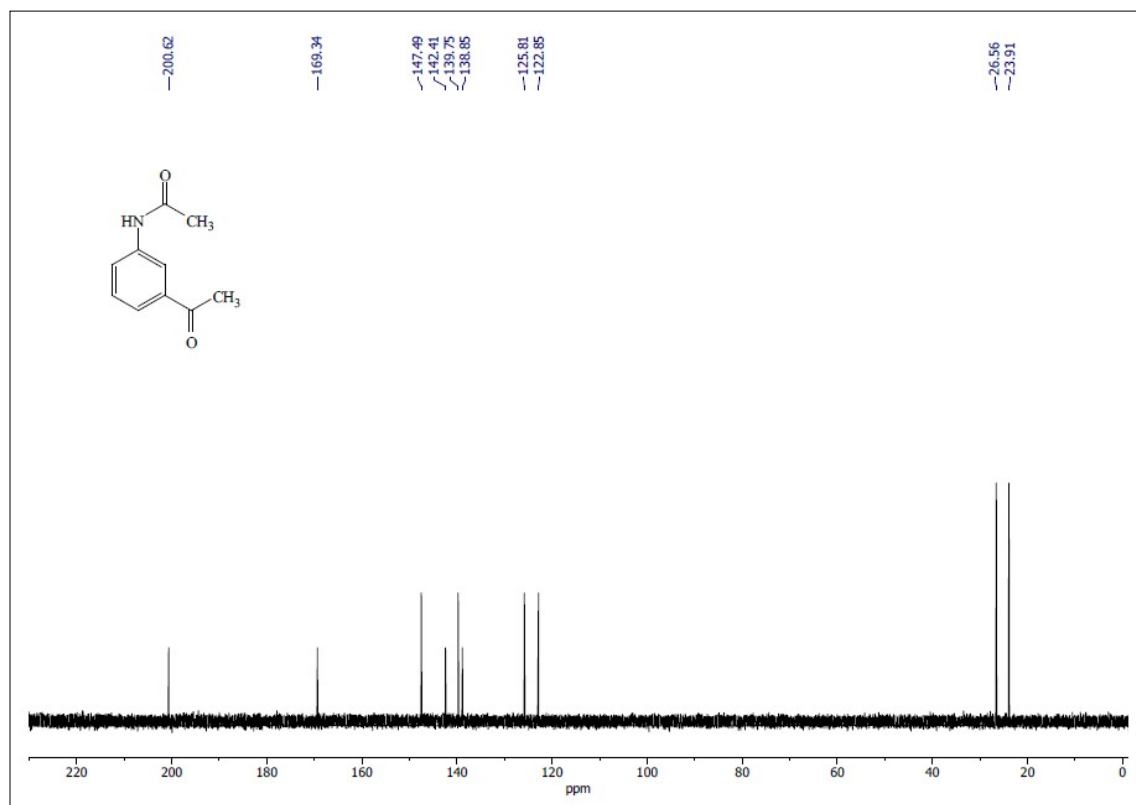

Supplement: d2ra02293a1.pdf [file d2ra02293a1.pdf]
